# Supplementary material
Source: Research Square preprint supplement (doi:10.21203/rs.3.rs-9024229/v1)

Au@Ag alloy containing interior hotspots galvanically prepared on an in-vitro diagnostic material for ultrasensitive and rapid detection of plasticizers

Soo Hyun Leea, ChaeWon Munb, Jun-Yeong Yangb, Seunghun Leeb, and Sung-Gyu Parka,b,*

*aDivision of Genetic Analysis Materials Research, Korea Institute of Materials Science (KIMS), Changwon 51508, Republic of Korea*

*bAdvanced Bio and Healthcare Materials Research Division, Korea Institute of Materials Science (KIMS), Changwon 51508, Republic of Korea*

*E-mail: sgpark@kims.re.kr

**Keywords**

Surface-enhanced Raman spectroscopy, Galvanic reaction, Interior hotspots, Plasticizers, Lateral flow assay

**
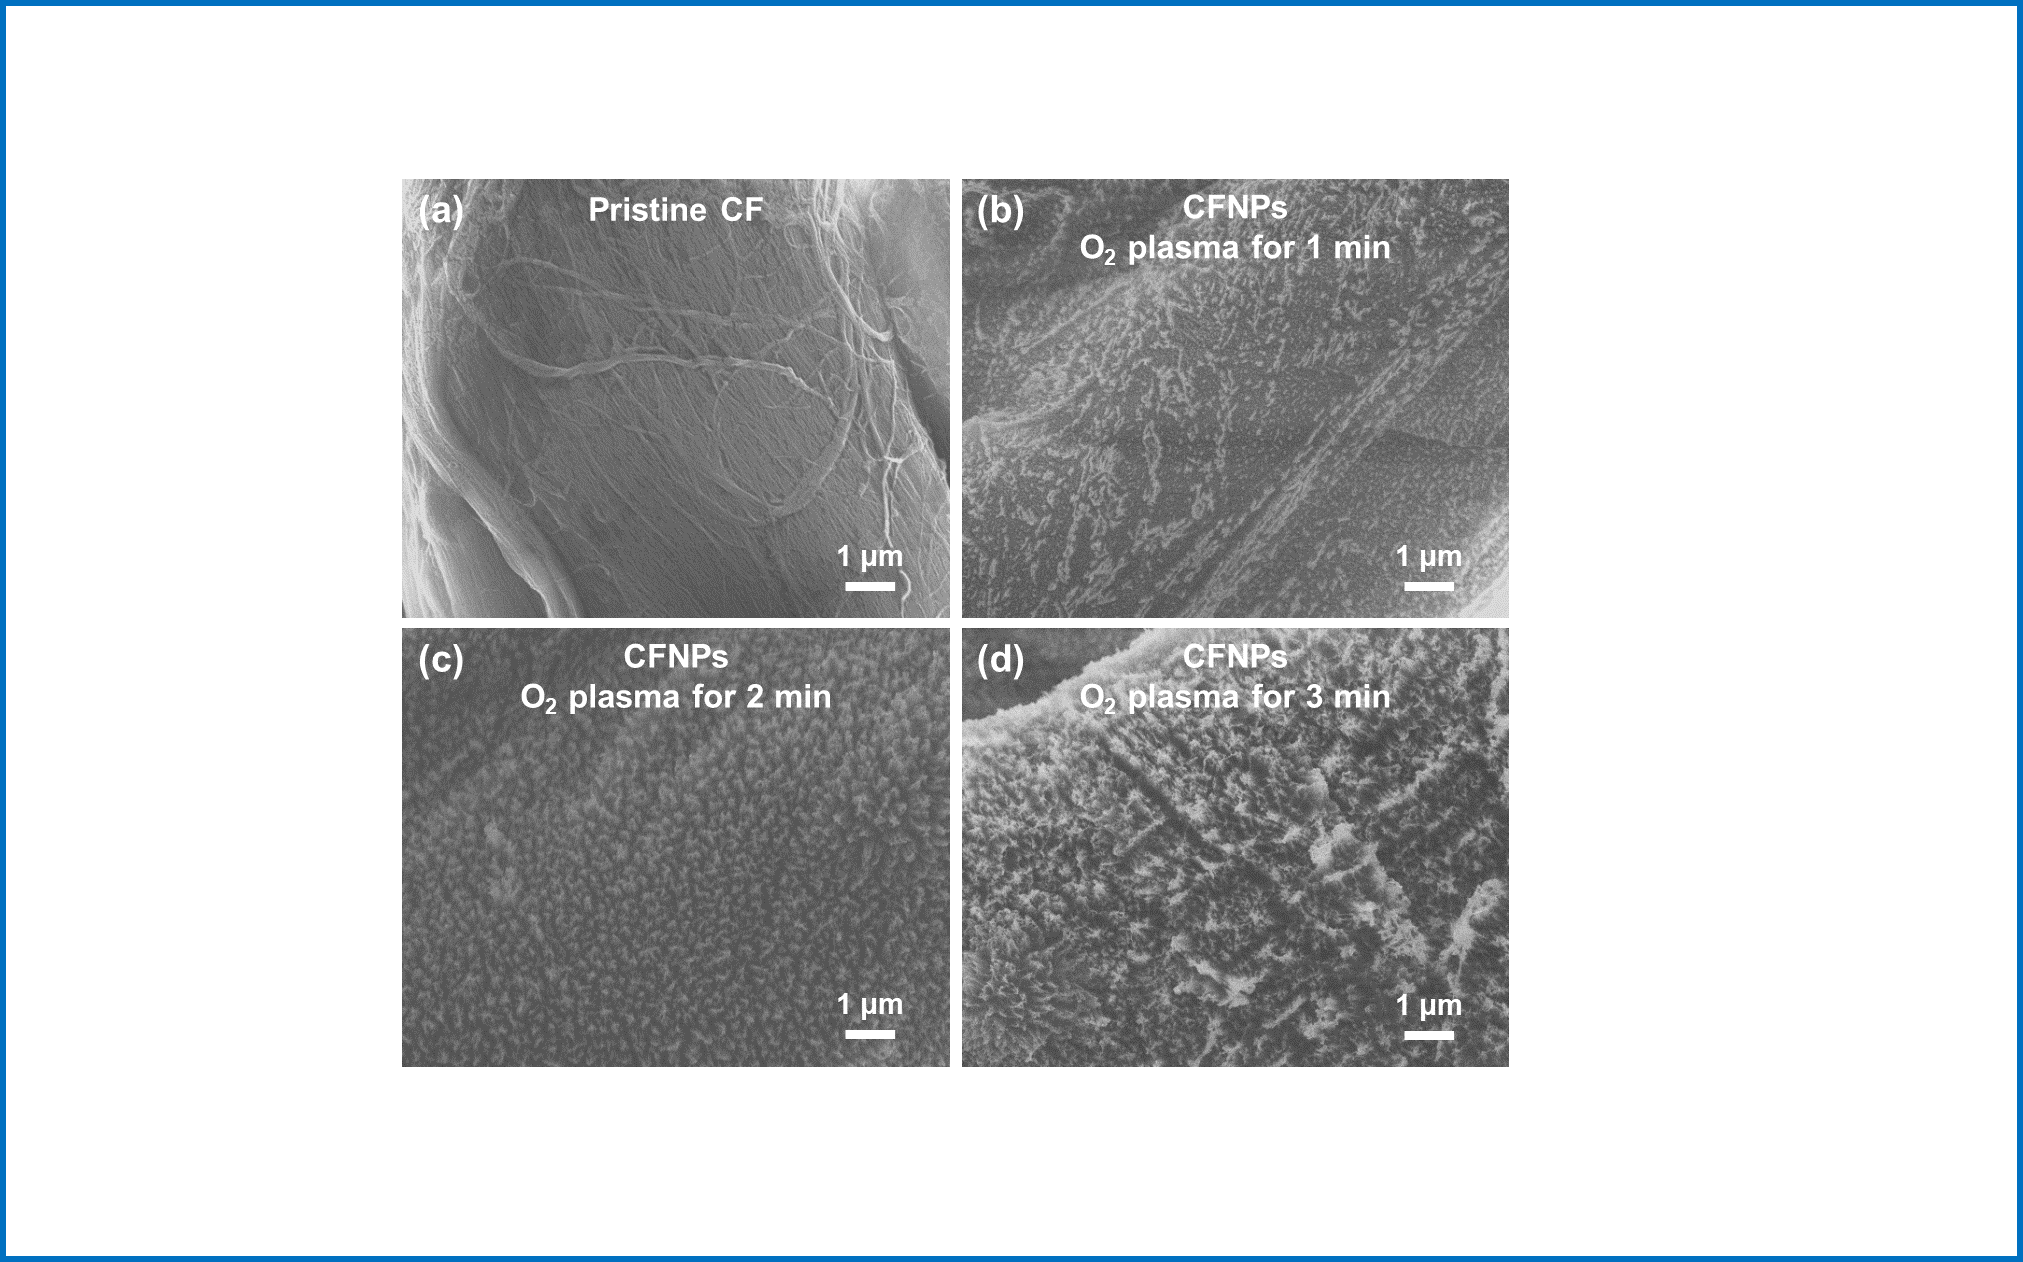
**

**Fig. S1.** Influence of plasma treatment time on CFNP morphology. SEM images of CFNPs subjected to O2 plasma treatment for (a) 0, (b) 1, (c) 2, and (d) 3 min.

**
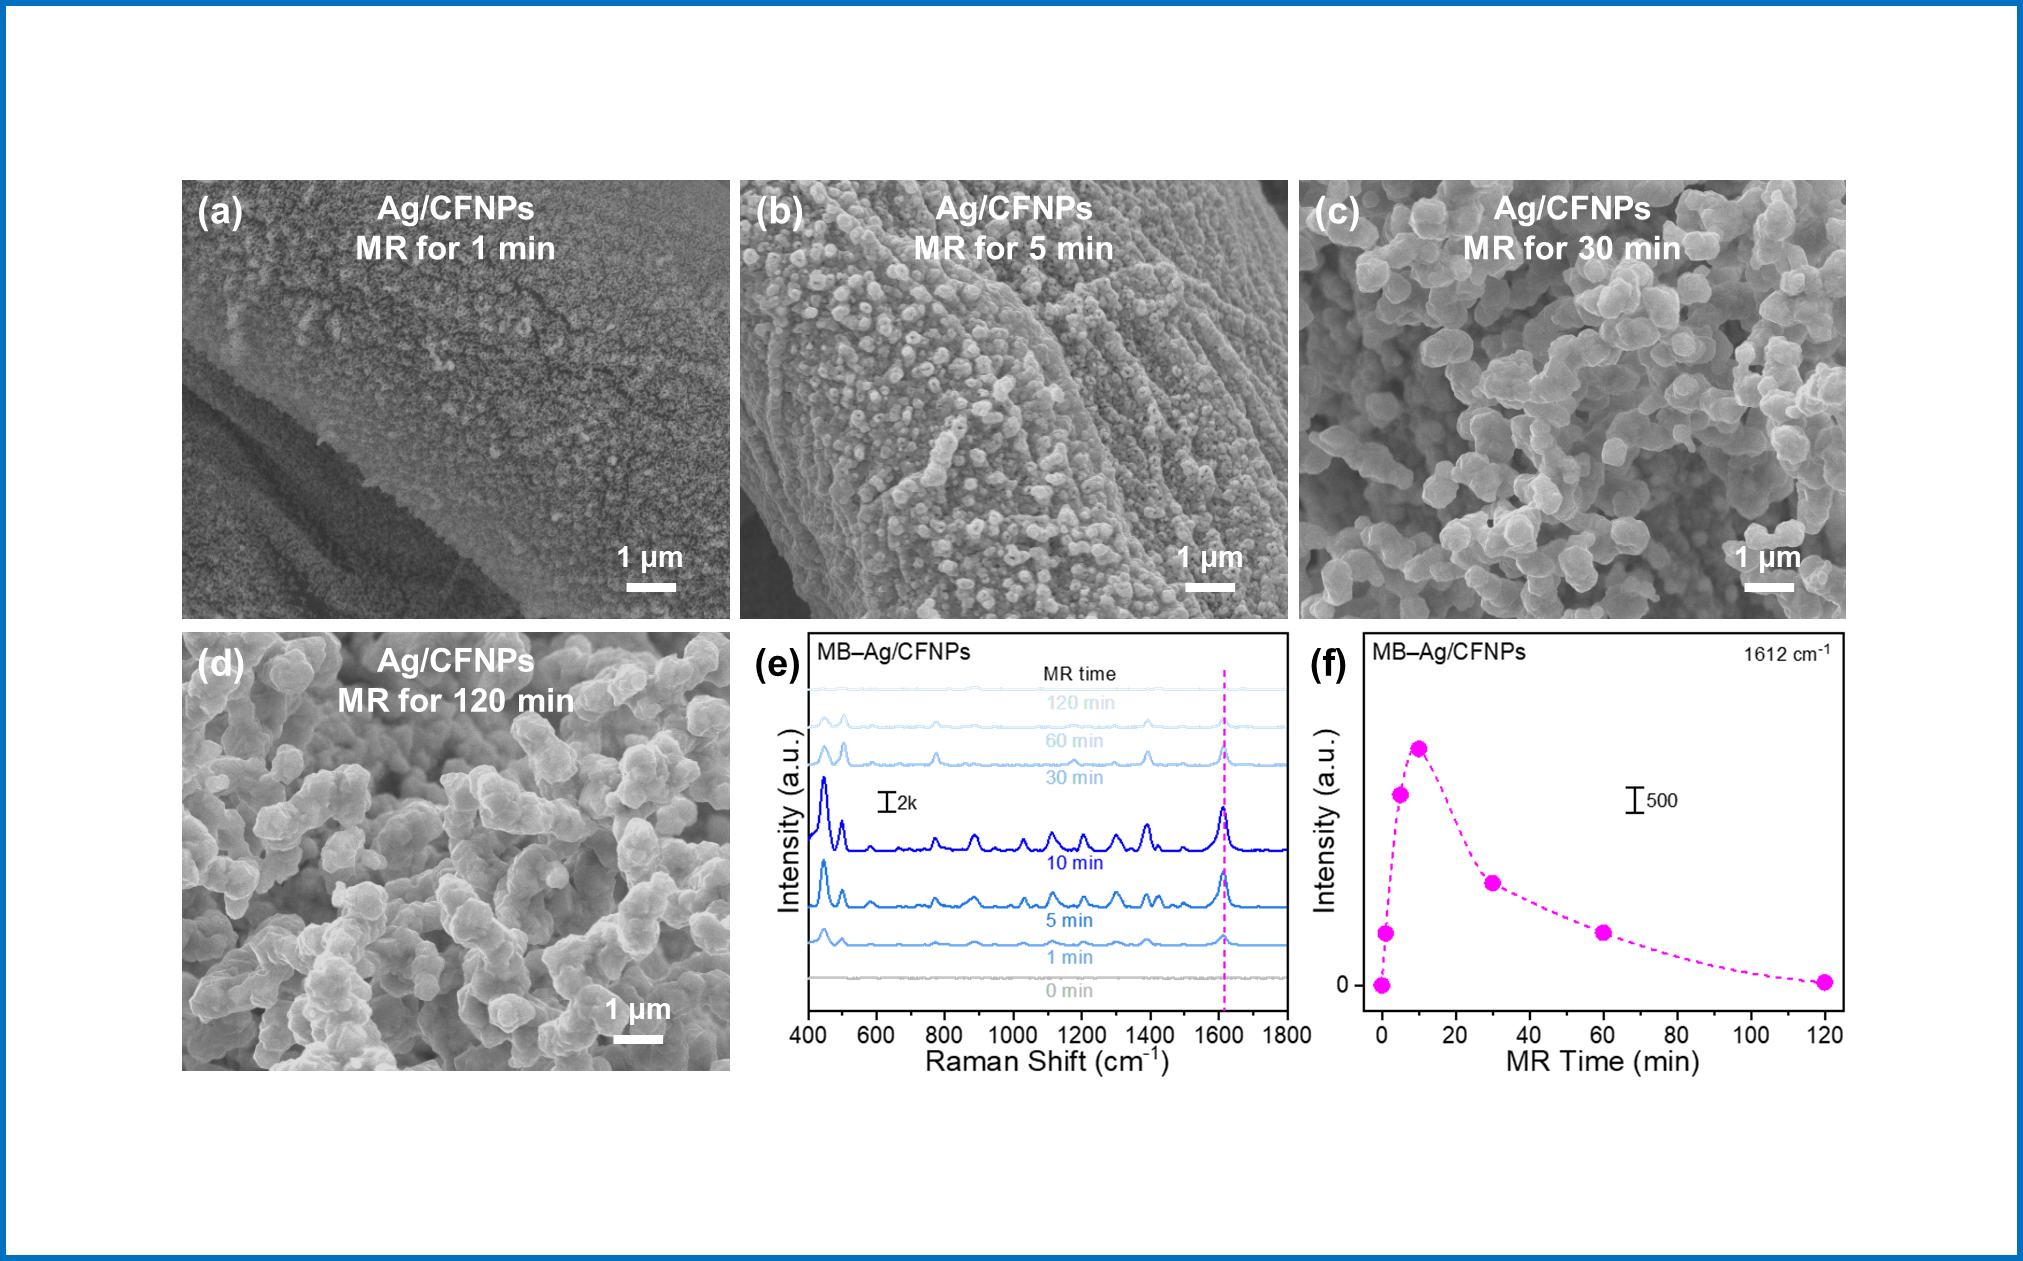
**

**Fig. S2.** Influence of Ag MR time on SERS activity. SEM images of Ag/CFNPs after MR for (a) 1, (b) 5, (c) 30, and (d) 120 min. (e) SERS spectra of MB−Ag/CFNPs for different MR times, and (f) the corresponding intensity profile at 1612 cm−1.

**
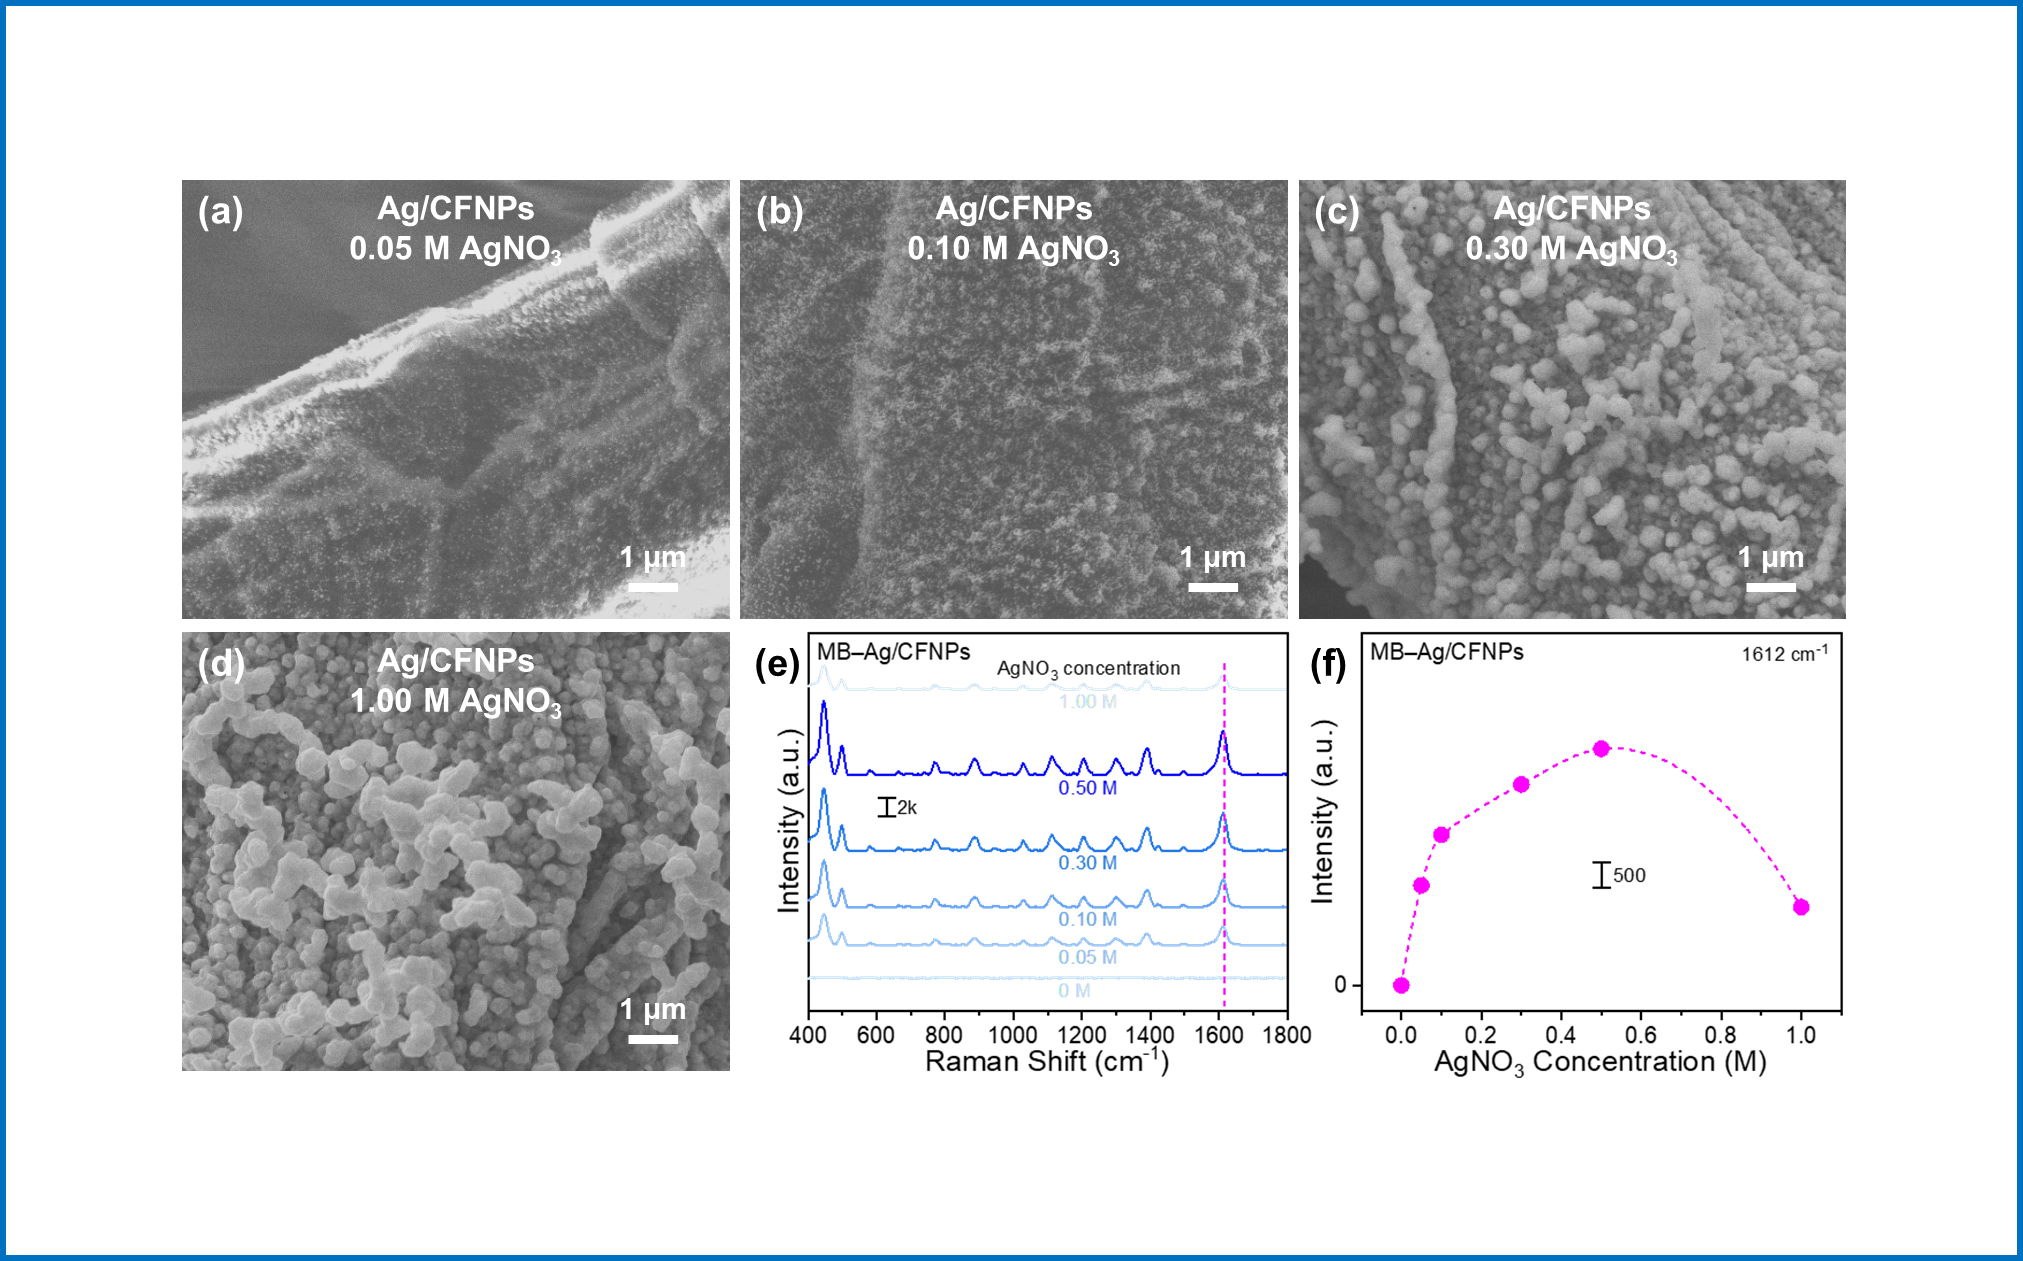
**

**Fig. S3.** Influence of AgNO3 concentration on SERS activity. SEM images of Ag/CFNPs with AgNO3 concentrations of (a) 0.05, (b) 0.1, (c) 0.3, and (d) 1.0 M. (e) SERS spectra of MB−Ag/CFNPs at different AgNO3 concentrations, and (f) the corresponding intensity profile at 1612 cm−1.

**
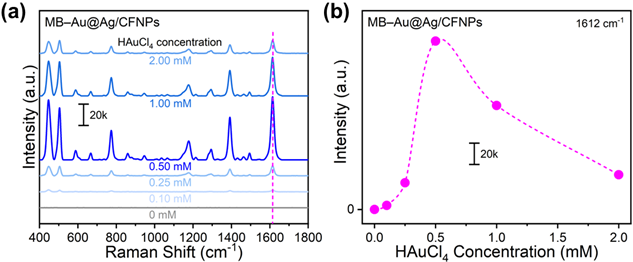
**

**Fig. S4.** Influence of HAuCl4 concentration on SERS activity. (a) SERS spectra of MB−Au@Ag/CFNPs for HAuCl4 concentrations of 0, 0.1, 0.25, 0.5, 1.0, and 2.0 mM, and (b) the corresponding intensity profile at 1612 cm−1.


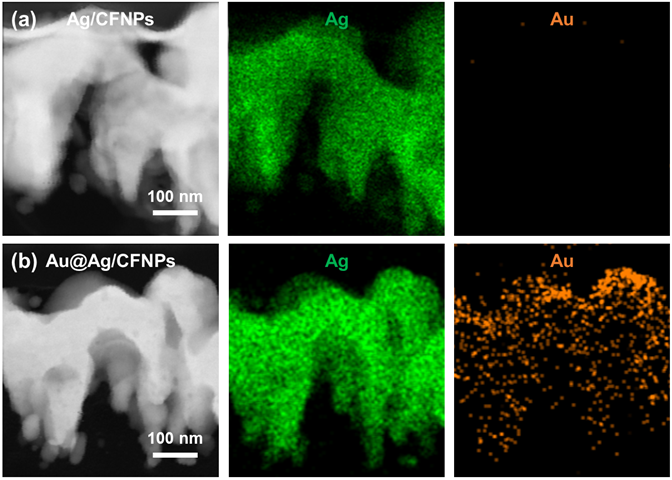


**Fig. S5.** Analysis of interior hotspots. STEM and elemental mapping images of (a) Ag/CFNPs and (b) Au@Ag/CFNPs.


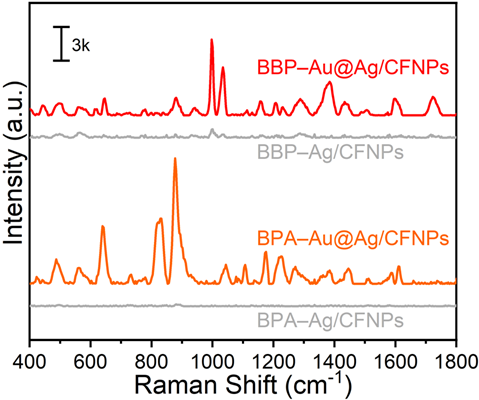


**Fig. S6.** Function of interior hotspots for signal enhancement. SERS spectra of plasticizer−Ag/CFNPs compared with *in situ* plasticizer−Au@Ag/CFNPs.

**Table S1.** SERS peak assignments of MB used in the present study.


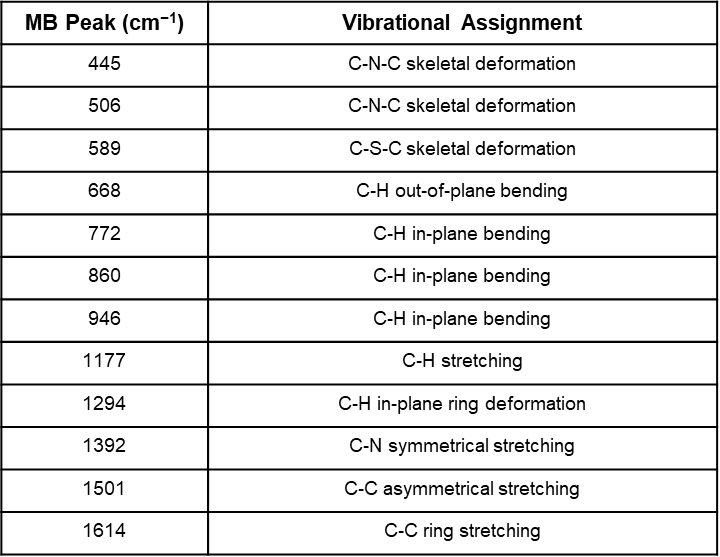


**Table S2.** SERS peak assignments of BBP used in the present study.


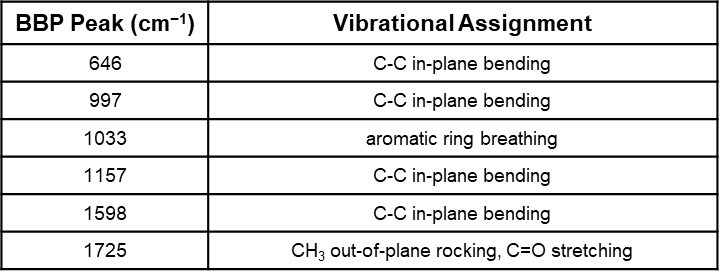


**Table S3.** SERS peak assignments of BPA used in the present study.


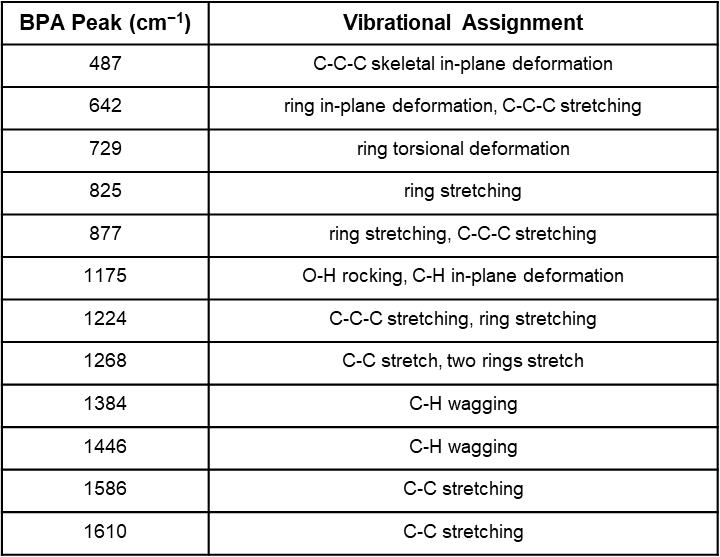

Supplement: Supplementary file 1 [file 9afb414f8dd6a37ae591edbd.docx]
